# Supplementary material for: Dynamic Evaluation of Circulating miRNA Profile in EGFR-Mutated NSCLC Patients Treated with EGFR-TKIs
Source: MDPI journal article supplement (doi:10.3390/cells10061520), 2021-06-16
Supplement: s1 [file s1]

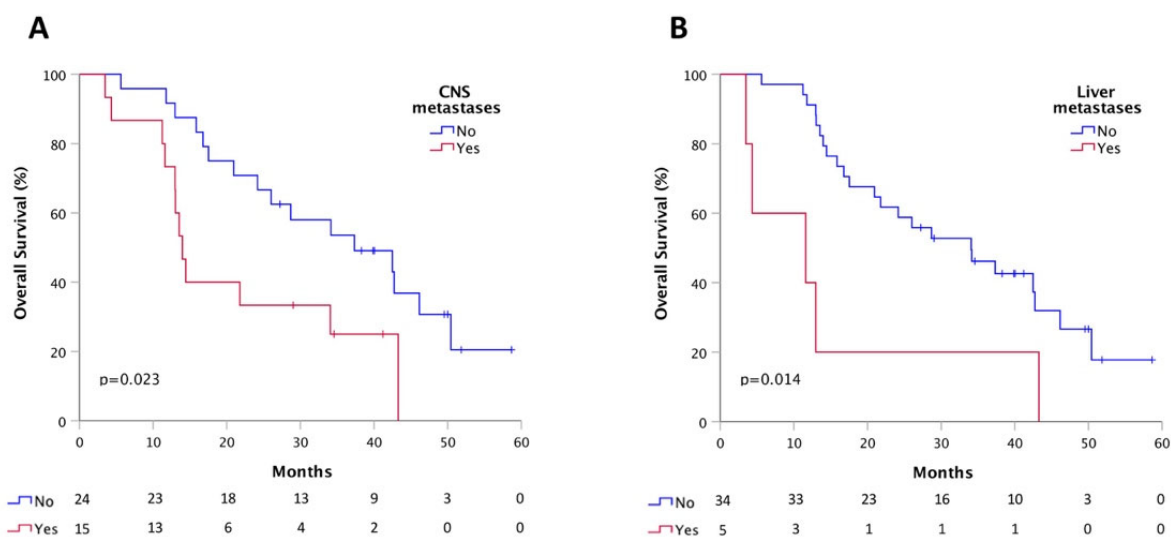

**Figure S1.** Kaplan Meier curves for central nervous system (CNS) metastases (A) and liver metastasis (B) and correlation with OS.

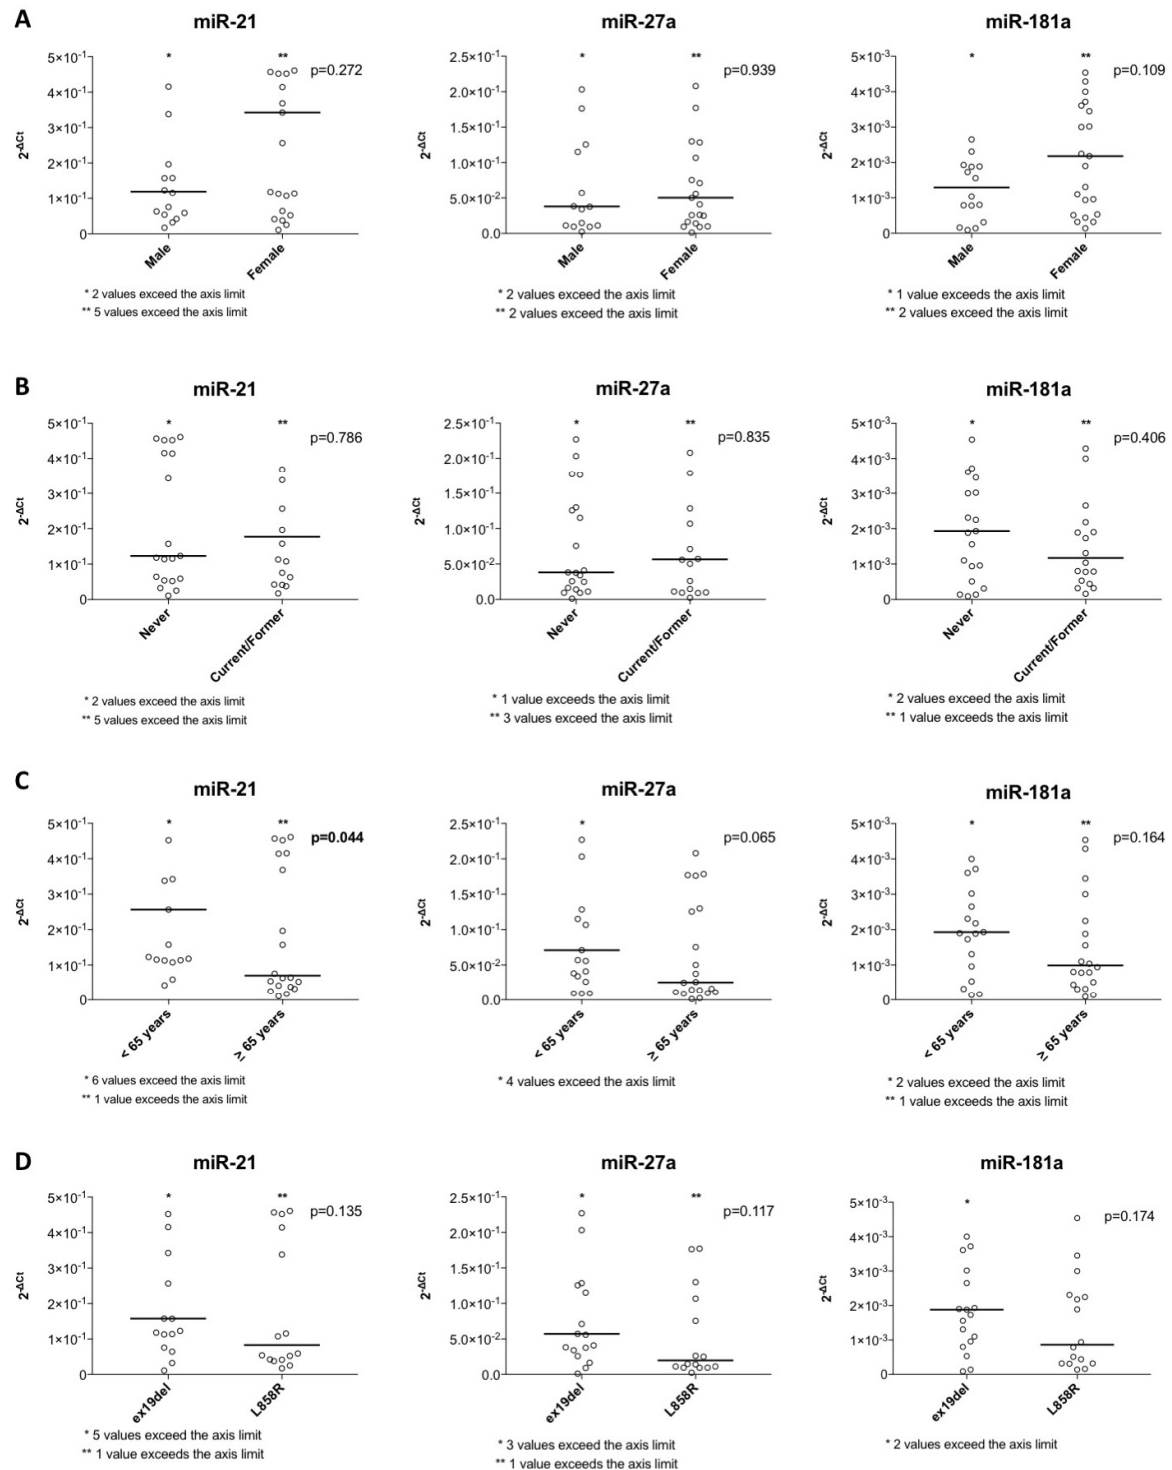

**Figure S2.** Basal miRNA expression and correlation with gender (A), smoking status (B), age (C) and type of *EGFR* mutation (D). The black line represents the median value in each graph.

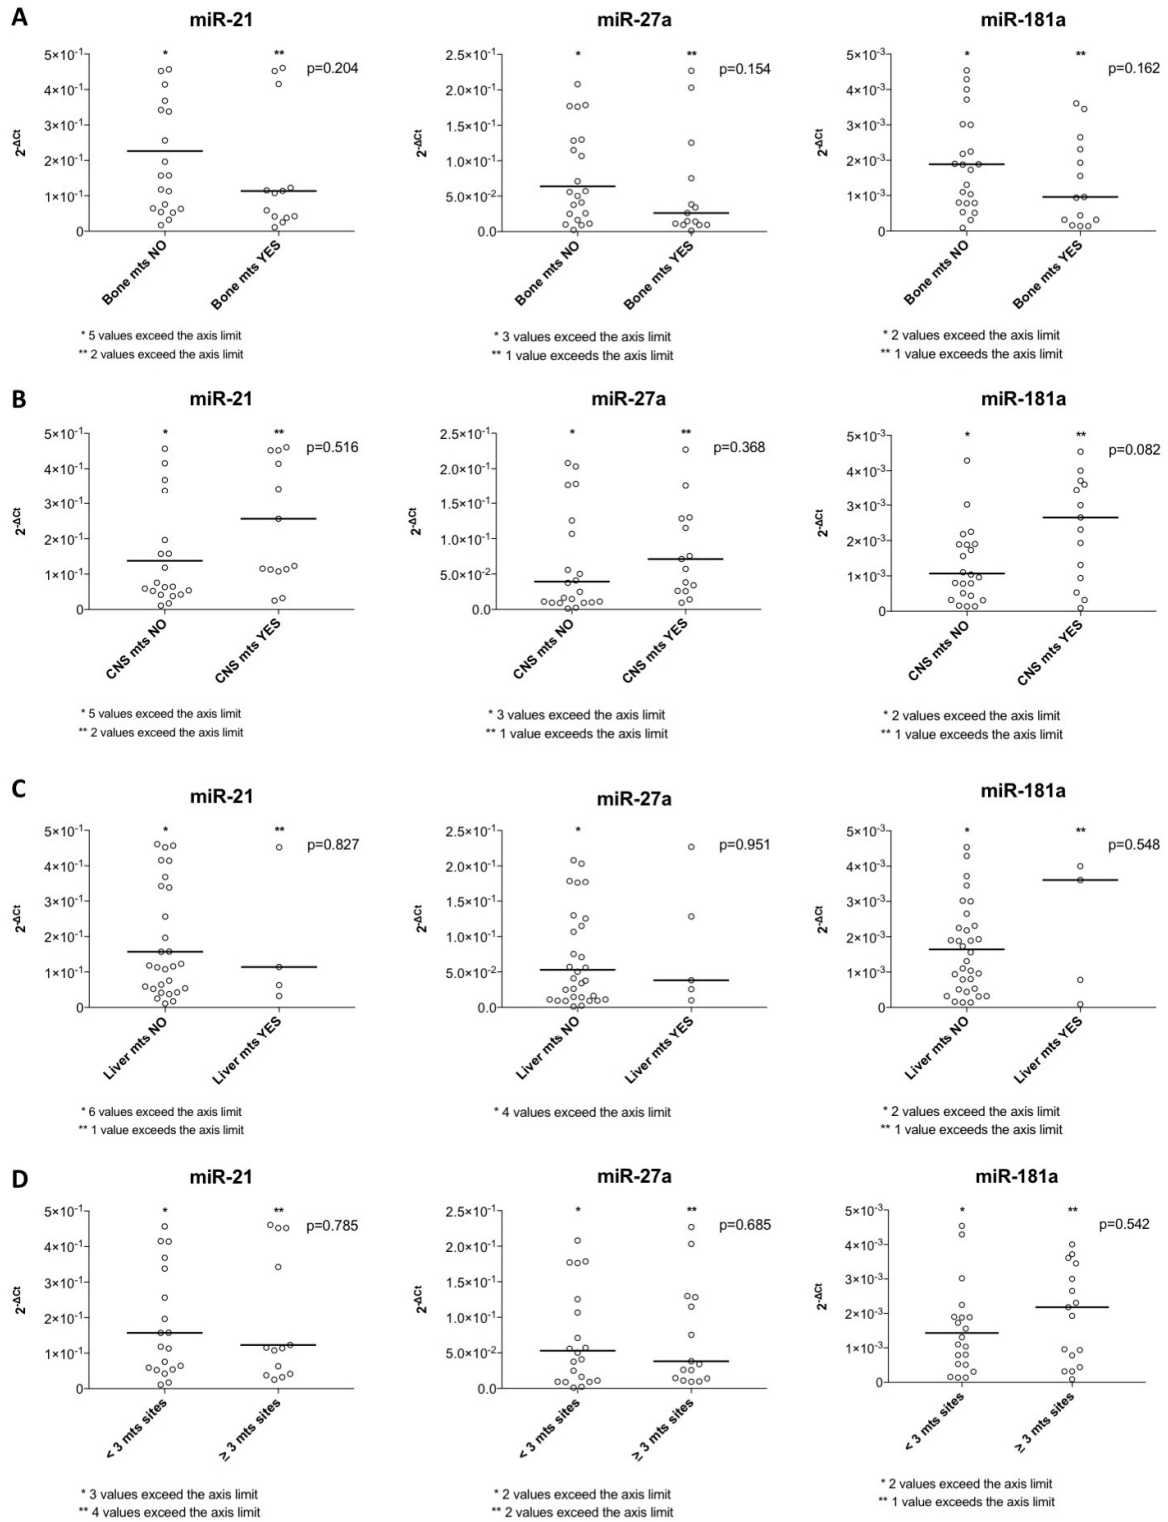

**Figure S3.** Basal miRNA expression and correlation with bone metastasis (mts) (A), central nervous system (CNS) mts (B), liver mts (C) and number of mts sites (D). The black line represents the median value in each graph.

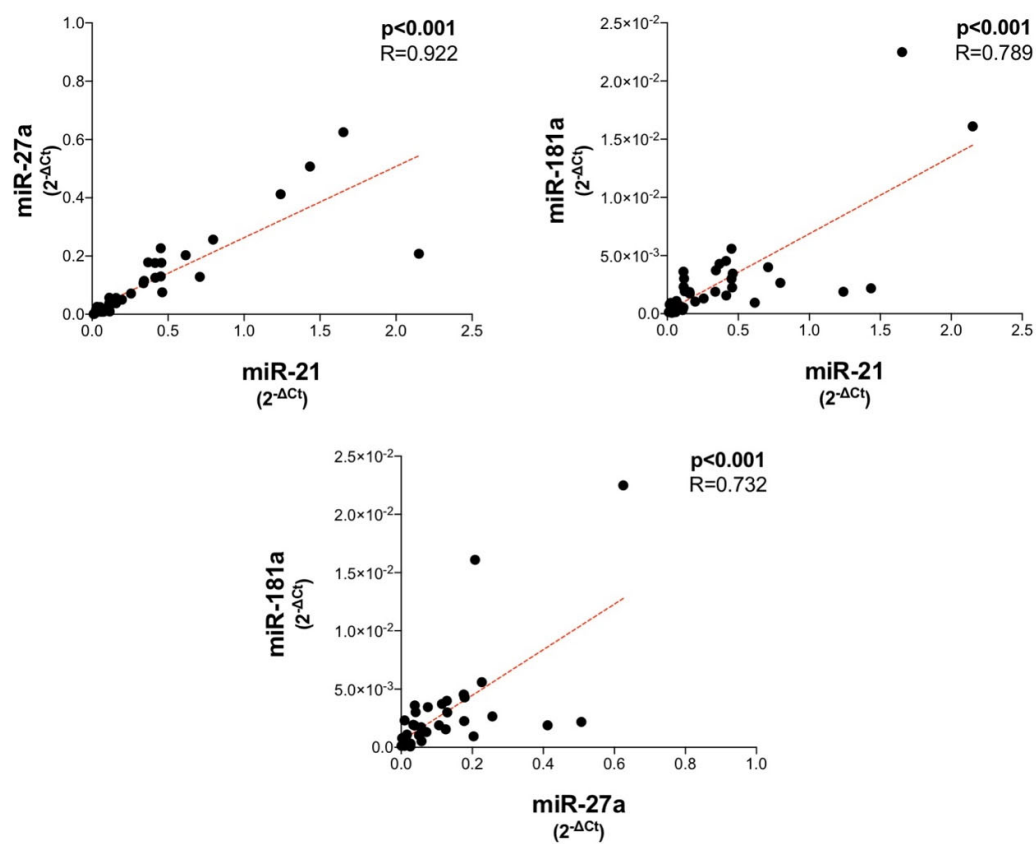

**Figure S4.** Correlation between basal miRNA values.

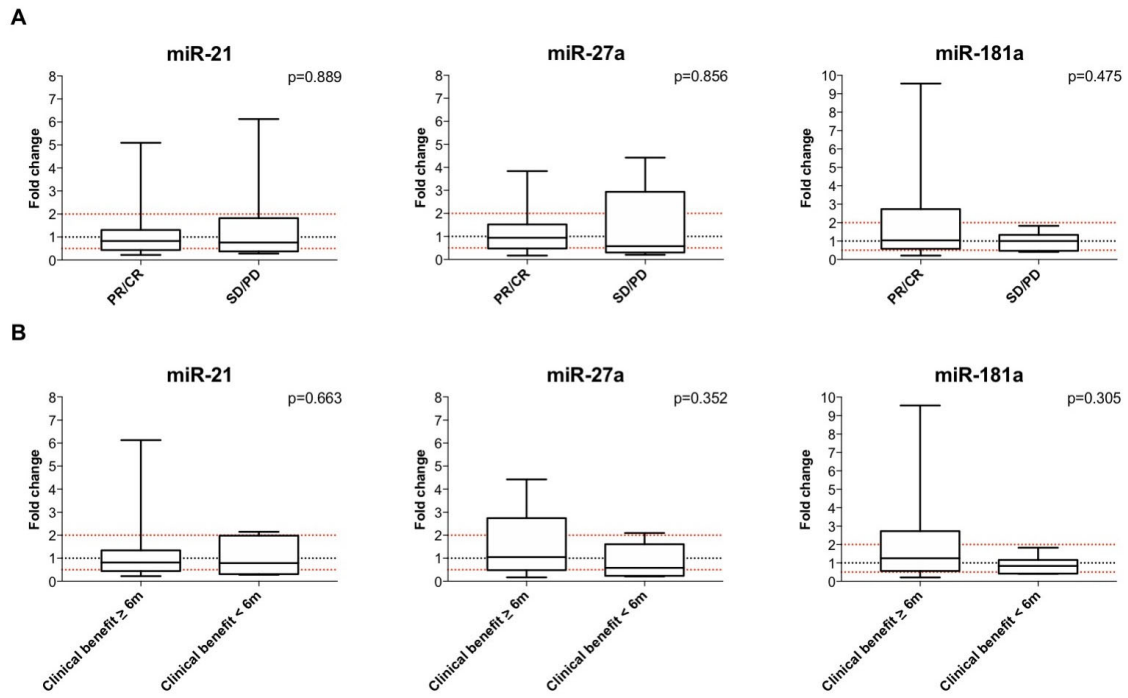

**Figure S5.** Modulation of miRNA expression at t2 and correlation with EGFR-TKI response (A) and duration of clinical benefit (B).

**Table S1.** Anti-proliferative effect of gefitinib, afatinib or osimertinib in NSCLC cells characterized for their *EGFR* and *K-RAS* status.

| Cell line | <i>EGFR</i> status                   | <i>KRAS</i> status | Gefitinib IC <sub>50</sub> (μM) | Afatinib IC <sub>50</sub> (μM) |
|-----------|--------------------------------------|--------------------|---------------------------------|--------------------------------|
| A549      | WT                                   | Mut (G12S)         | 8.0±0.2                         | 5.3±0.1                        |
| NCI-H1299 | WT                                   | WT                 | 7.9±0.6                         | 5.6±0.4                        |
| NCI-H23   | WT                                   | Mut (G12C)         | 11.2±0.7                        | 4.5±0.2                        |
| NCI-H1650 | delE746-A750<br>( <i>PTEN del</i> )  | WT                 | 2.0±0.03                        | 3.3±0.2                        |
| HCC827GR5 | delE746-A750<br>( <i>cMET ampl</i> ) | WT                 | 8.7±0.7                         | 5.0±0.6                        |
| NCI-H3255 | L858R                                | WT                 | 0.020±0.004                     | 0.008±0.002                    |
| HCC827    | delE746-A750                         | WT                 | 0.011±0.003                     | 0.005±0.001                    |
| PC9       | delE746-A750                         | WT                 | 0.040±0.004                     | 0.009±0.001                    |

wild-type; Mut, mutant; del, deletion; ampl, amplification

WT,

**Table S2.** List of patients' comorbidities and correlation with miRNA levels.

| Comorbidity               | Number of patients (%) | Differences in<br>miR-21 | Differences in<br>miR-27a | Differences in<br>miR-181a |
|---------------------------|------------------------|--------------------------|---------------------------|----------------------------|
| Cardiovascular:           |                        |                          |                           |                            |
| • Hypertension            | 18 (46)                | p=0.995                  | p=0.549                   | p=0.651                    |
| • Ischemic cardiomyopathy | 5 (13)                 | p=0.665                  | p=0.223                   | p=0.420                    |
| • Arrhythmia              | 5 (13)                 | p=0.237                  | p=0.378                   | p=0.137                    |
| Metabolic:                |                        |                          |                           |                            |
| • Diabetes                | 7 (18)                 | p=0.576                  | p=0.255                   | p=0.512                    |
| • Hyperlipidemia          | 5 (13)                 | p=0.606                  | p=0.639                   | p=0.505                    |
| Viral hepatitis           | 3 (13)                 | p=0.596                  | p=0.564                   | p=0.468                    |
